# Supplementary material for: Comprehensive functional enrichment analysis of male infertility
Source: PubMed Central journal article supplement (PMC5693951; doi:10.1038/s41598-017-16005-0), 2017-11-17
Supplement: 41598_2017_16005_MOESM1_ESM.pdf [file 41598_2017_16005_MOESM1_ESM.pdf]

## SUPPLEMENTARY TABLES

### Comprehensive functional enrichment analysis of male infertility

Seyed Morteza Razavi<sup>1</sup>, Marjan Sabbaghian<sup>2\*</sup>, Mahdi Jalili<sup>3</sup>, Adeleh Divsalar<sup>1</sup>, Olaf Wolkenhauer<sup>4</sup>, Ali Salehzadeh-Yazdi<sup>4\*</sup>

<sup>1</sup>Department of Cell and Molecular Biology, Faculty of Biological Sciences, Kharazmi University, Tehran, Iran

<sup>2</sup>Department of Andrology, Reproductive Biomedicine Research Center, Royan Institute for Reproductive Biomedicine, ACECR, Tehran, Iran.

<sup>3</sup>Hematology, Oncology and SCT Research Center, Tehran University of Medical Sciences, Tehran, Iran.

<sup>4</sup>Department of Systems Biology and Bioinformatics, University of Rostock, 18051 Rostock, Germany

#### Correspondences:

Ali Salehzadeh-Yazdi

University of Rostock

Department of Systems Biology and Bioinformatics

Rostock, Germany

[ali.salehzadeh-yazdi@uni-rostock.de](mailto:ali.salehzadeh-yazdi@uni-rostock.de)

Marjan Sabbaghian

Department of Andrology, Reproductive Biomedicine Research Center

Royan Institute for Reproductive Biomedicine, ACECR,

Tehran, Iran

[marjan.sabbaghian@gmail.com](mailto:marjan.sabbaghian@gmail.com)

**Supplementary Table S1.** Differentially expressed genes of azoo-oligo-terato-spermia

**Supplementary Table S2.** Up- and Down- regulated Biological Process, Cellular Component, Molecular Function and KEGG Pathways in Maturation Arrest Azoospermia, Oligospermia and Teratospermia.

**Supplementary Table S3.** Differentially expressed genes of Post Meiotic Arrest, Meiotic Arrest, Pre Meiotic Arrest and Sertoly Cell Only Syndrome

**Supplementary Table S4.** Up- and Down- regulated Biological Process, Cellular Component, Molecular Function and KEGG Pathways in Post MA, MA, Pre MA and SCOS

Supplementary Table S1. Differentially expressed genes of azoo-oligo-terato-spermia

| Up-Regulated Genes |                 |              |           | Down-Regulated Genes |          |                   |              |               |                 |               |          |
|--------------------|-----------------|--------------|-----------|----------------------|----------|-------------------|--------------|---------------|-----------------|---------------|----------|
| Maturation Arrest  |                 | oligospermia |           | teratospermia        |          | Maturation Arrest |              | oligospermia  |                 | teratospermia |          |
| AAMDC              | HIGD1A          | PLCZ1        | A2M       | A1CF                 | RAPGEF2  | AADAC             | FSCB         | SPACA4        | ABHD2           | ABHD16B       | RDH8     |
| ABCA10             | HIST1H2AC       | PLDN         | ABCB10    | ABCC13               | RAPSN    | ABHD1             | FSCN3        | SPACA7        | ACSBG2          | ACADAM        | RIMBP3C  |
| ABCA6              | HIST1H2B        | PLEK2        | ABIC3BP   | ABCC9                | RLB1     | ABIB3P            | FTMT         | SPAG6         | ACTL7B          | ACOT11        | RNF20    |
| ABCA8              | HIST2H2AB       | PLEKHG4      | ABRA      | ACKR4                | RBMS3    | ACADSB            | GADD45GIP1   | SPANXA1       | ACTRT2          | ADAM32        | RPL10A   |
| ABCA9              | HIVEP2          | PLPP3        | ACYP2     | ACSM2A               | REL      | ACR               | GALNTL5      | SPANXB1       | ALS2CR11        | ADAP2         | RPL12    |
| ABHD7              | HLA-DMB         | PMP22        | ANK3      | ACVR1B               | RNF144B  | ACRBP             | GAPDHS       | SPANXC        | ANKRD7          | ALDH1A2       | RPL13A   |
| ABIB3P             | HLA-DPA1        | PNPLA8       | APOBEC2   | ADAM18               | ROR1     | ACRV1             | GEMIN4       | SPATA16       | APH1B           | ALDOA         | RPL15    |
| ACAT2              | HLA-DPB1        | PNRC2        | ARHGAP1   | ADAMT53              | RORA     | ACRSBG2           | GFR2A        | SPATA17       | ARL4A           | ALOX15B       | RPL22    |
| ACSBG2             | HLA-DQA1        | POMK         | ATP7B     | ADAMT55              | RPL37A   | ACSL6             | GGN          | SPATA18       | ARMC12          | ALOX5AP       | RPL3     |
| ACSM3              | HLA-DRA         | PP12719      | C10ORF71  | ADH1B                | RPL6     | ACTG2             | GGTL2C       | SPATA19       | ASXL1           | AMFR          | RPL35A   |
| ACSS2              | HMGB1           | PRKAA2       | C11ORF21  | ADH4                 | RSAD2    | ACTL7A            | GIMAP5       | SPATA20       | APP             | RPL4          |          |
| ACSS3              | HMGCCL1         | PRKACB       | CACNA1S   | ADH4L                | RTP5     | ACTL7B            | GINS1        | SPATA22       | ATP5G1          | APPBP2        | RPL8     |
| ACTL7A             | HMGR            | PRKRIR       | CCDC102A  | AK5                  | RUNDCC3B | ACTRT2            | GK2          | SPATA3        | BRD7            | AQP11         | RPLP2    |
| ACTL7B             | HMGS3           | PROK1        | CKK       | AKR7A2               | RUNX1T1  | ADAD1             | GKAP1        | SPATA31A7     | C11ORF71        | AQP2          | RPS11    |
| ADAMTS12           | HNF4G           | PRPS2        | CD48      | ALPP                 | SCD5     | ADAM2             | GLP1R        | SPATA31C1     | C12ORF56        | ARFGAP1       | RPS15    |
| ADAMTS5            | HNRNPJ          | PSMA2        | CHL1      | AMY2B                | SCGB1D1  | ADAM29            | GLT1D1       | SPATA4        | C15ORF48        | ARHGAP19      | RPS16    |
| ADIRF              | HOOK1           | PSMA3        | CLEC10A   | ANKFN1               | SCN11A   | ADAM32            | GLT6D1       | SPATA6        | C1R             | ARHGAP4       | RPS24    |
| AK3L1              | HRASLS          | PSMC6        | CLEC14A   | APCDD1L              | SEMA6D   | ADAM5             | GPR135       | SPATA9        | C22ORF23        | ARID4B        | RPS3     |
| AKAP13             | HS3ST1          | PTK2         | CPNE6     | ARG2                 | SERF1A   | ADAM7             | GPR64        | SPATA5        | C2ORF31         | ARMC2-AS1     | RPS5     |
| AKR1C3             | HS3ST3B1        | PTPRA        | CSR3P     | ASTN2                | SH3TC1   | AIPL1             | GPRASP1      | SPERT         | C2ORF32         | ARPC5L        | RSL24D1  |
| ALDH1A3            | HSD11B1         | PTPRD        | CUX1      | ATP8B3               | SHOX     | AKAP1             | GPX5         | SPIN4         | CCDC54          | ATP5O         | RSPH14   |
| ANAPC10            | HSD17B11        | PWAR6        | CYLD      | B3GALT2              | SLC22A7  | AKAP4             | GRIK5        | SPINK2        | CCDC71L         | AURKA         | SEC31B   |
| ANPPTL1            | HSD17B3         | RAB41        | CYP2C18   | B4GALT2              | SLC26A3  | ALS2CR11          | GGG1         | SPTBN2        | CCDK3           | BAG2          | SELENOF  |
| ANKRD20A9P         | HSD17B6         | RALGAPA1     | CYP8B1    | BACH2                | SLC39A8  | AMOTL2            | GSTM1        | STG6GALNAC2   | CENPL           | BCKDHB        | SEMG1    |
| ANKRD7             | HSD3B1          | RARRS2       | DHRS7     | BBS4                 | SMCO1    | ANKEF1            | GSTTP2       | STAM          | CENPU           | BCL9          | SEMG2    |
| ANP32A             | HSD3B2          | RBMS3        | DMPK      | BCL11A               | SMG6     | ANKRD13B          | GTSF1A       | STATA4        | CEP76           | BEX3          | SEPP1    |
| ANP32B             | HSPA4L          | RBMV2EP      | DNAH1     | BCL7A                | SNAPC1   | ANKRD5            | GUCA1A       | STK31         | CFAP45          | BEX4          | SEPTIN10 |
| ANTXR1             | HSPA8           | RBP1         | DNAJC19   | BCORL1               | SNTG1    | ANKRD53           | HAAO         | STON1-GTF2A1L | CFAP70          | BLOC1S5       | SEPTIN12 |
| ANXA1              | HSPB3           | RBX1         | DTNA      | BICD1                | SOC54    | ANKRD55           | HEATR9       | SUN3          | CFAP74          | BTBD6         | SEPTIN5  |
| APOL3              | IER2            | RDX          | EDN2      | BNC2                 | SORBS1   | ANKRD7            | HEMGN        | SUN5          | CKS2            | C2ORF197      | SF3B6    |
| ARHGAP12           | IER3            | RFPL4A       | FABP4     | BRWD1                | SOX11    | ANO1              | HIPK4        | SYK           | CLGN            | C4ORF19       | SGSH     |
| ARHGFEF6           | IFI4L4          | RHBDGF1      | FBXW11    | BZW2                 | SOX5     | APBB3             | HIST1H2BA    | SYTL3         | CRISP2          | CACNA11       | SLI1     |
| ARL4A              | IFI1T1          | ROBO1        | GAD1      | C11ORF1              | SQSTM1   | APBEC4            | HLA-DPB1     | TBATA         | DAZ1            | CAMSA19       | SIAH1    |
| ASAP2              | IGF1            | RPA4         | GIMAP6    | C11ORF74             | SRGAP2C  | AQP5              | HMGB4        | TBC1D21       | DHX2            | CARD16        | SLC25A43 |
| ASB13              | IGF2            | RPL15        | GPM6A     | C14ORF37             | SRGAP2C  | ARMC12            | HOOK1        | TBC1D3G       | DRHS9           | CBARP         | SLC35A1  |
| AT2G2A             | IGFBP4          | RPL21P28     | HEBP2     | C16ORF87             | SSX2     | ARMC3             | HOXB5        | TBL3          | DMRTB1          | CBLN1         | SLC38A9  |
| ATM                | IGFBP5          | RPL23P8      | IL12A     | C19ORF57             | STOX2    | ARRB1             | HSFY1        | TCAIM         | DNAI1           | CBX1          | SLC6A2   |
| ATP1B3             | IGFBP6          | RPL31        | ITPKC     | C2ORF15              | STRN     | ASB17             | HYD1N        | TDRD3         | DPY19L2         | CBX3          | SMCP     |
| ATP5L2             | IGFB6           | RPL6         | KAT6B     | C5AR2                | SYCE1L   | ASPHD2            | IGSF10       | TEK73         | DZ1P1           | CCDC65        | SNORA70  |
| ATPV6V01P2         | IL16            | RPS3A        | KCNJ1     | C5ORF24              | SYNGR1   | ATP1A2            | IL13         | TESMIN        | EGR4            | CCNI          | SNORD139 |
| AZ12               | IL1A            | RPS6KA3      | KIAA1524  | C5ORF51              | SYNJ1    | ATP1A4            | INPP1        | TEX26         | EGM71E1         | CCN4          | SNORD68  |
| B2M                | IL1RAP          | RRS1         | LINC01108 | CA13                 | SYTL3    | ATP8B3            | IQCF5        | TEX29         | FKBP6           | CD38          | SPRCS1   |
| BCCIP              | ING4            | SAMD9L       | LINC01136 | CACNA1E              | SYTL4    | BNF2              | IRGC         | TEX38         | FNDC11          | CD48          | SPINK2   |
| BCCORL1            | INGA            | SC5D         | LMOD2     | CADPS                | TAFB4    | BAP1              | ISG20L2      | THB51         | FUSC            | CD74          | SPML2C   |
| BET1               | INHBA           | SCARNA7      | LOC145783 | CCDC9                | TAS2R9   | BB55              | ITGA9        | THEG          | FUCA2           | CDC42EP3      | SRGN     |
| BHMT2              | IPO7            | SCARNA9      | LOH12CR2  | GCLL16               | TBPL2    | BCL2L14           | ITGA9        | THYN1         | GCA             | CDK3          | SRP9     |
| BPI                | ITGC            | SDCBP        | LPL       | CCNG1                | TC2N     | BP1FA3            | IZUMO4       | TIMD4         | GGH             | CDR2          | STK38    |
| C11ORF63           | ITM2A           | SDHD         | MAIP1     | CCR1                 | TCF15    | C10ORF62          | JAKMIP1      | TIMP4         | GK2             | CETN3         | STRN3    |
| C12ORF56           | JAM3            | SEPP1        | MDP1      | CDO1                 | TDG      | C11ORF21          | KCTD19       | TMC7          | GKAP1           | CFAP221       | SYCE3    |
| C14ORF105          | KCNK17          | SFR1         | MGAT2     | CCLF4                | TEAD3    | C11ORF52          | KDM3A        | TMCO5A        | GMCL1P1         | CHRNA5        | SYNGR1   |
| C15ORF48           | KCNK4           | SFRP1        | MLLT1     | CHRM3                | TEFM     | C11ORF75          | KIAA1324     | TMEM144       | GTF2A2          | CLDN11        | TAF7L    |
| C1D                | KCNQ1           | SFRP4        | MSLN      | CLDN6                | TEP1     | C12ORF25          | KIAA1683     | TMEM190       | GTSF1           | CLGN          | TCEAL4   |
| C1ORF115           | KCN3S           | SGOL1        | MTNR1A    | CLDN9                | TERF1    | C12ORF54          | KIF2B        | TMEM31        | HELLS           | COX6A1        | TCEB2    |
| C1ORF21            | KIAA0484        | SH3PXD2A     | MYH6      | CNKR2                | TMEM241  | C14ORF119         | KIR2DS2      | TMEM64        | HIP1            | COX7B         | TGFB1    |
| C1QA               | KIAA1199        | SIX3         | MYLK2     | CNOT9                | TMEM74   | C16ORF78          | KLFB-AS1     | TNC           | HMGB3           | CSAD          | TIMD4    |
| C1QB               | KIF1C           | SIX6         | MYOT      | COL11A1              | TNS2     | C16ORF82          | KLHL10       | TNFAIP6       | HRASLS          | CSNK2B        | TLR1     |
| C1R                | KLR2DL4         | SKA2         | NAP1L2    | COL4A3               | TRMU     | C17ORF105         | KLK5         | TNFAIP8L1     | HNSP4L          | CTST11        | TM6SF1   |
| C1S                | KLHL9           | SLC10A5      | NOL6      | CREB1                | TRFM3    | C17ORF53          | KLRB1        | TNP1          | INPP4A          | CTSD          | TMCO2    |
| C22ORF23           | KMT2C           | SLC16A2      | NRP2      | CTB3                 | TTCS     | C17ORF64          | KNG1         | TOR1A         | IRGC            | CUBN          | TMEM17   |
| C3ORF35            | KRR1            | SLC16A9      | NTS       | CUX2                 | TWISTNB  | C17ORF74          | KRT23        | TPP2          | ITCH            | CUTC          | TMEM43   |
| C6                 | KRT23           | SLC25A2      | NUS1      | CYP19A1              | UGT2A1   | C19ORF45          | KSR1         | TRIM2         | JKAMP           | CXCR4         | TNFRSF14 |
| C6ORF166           | KRT6A           | SLC25A51     | PHKG1     | CYP20A1              | UPF1     | C10KF108          | LACRT        | TRIM36        | KCNK4           | CYP7B1        | TN2P     |
| C6ORF203           | KRTAP19-8       | SLC37A3      | PLN       | DLK1                 | VPS4A    | C10RF111          | LAMP3        | TRIM42        | KIF15           | DNX52         | TOMM7    |
| C8ORF49            | KYAT3           | SLC38A1      | PLOD2     | DCN                  | WBP1L    | C10RF158          | LATS2        | TSACC         | KLHL1           | DDR           | TRAM1    |
| C9ORF78            | LAG3            | SLC40A1      | PLP2      | DICER1               | WDR82    | C10RF192          | LCA5L        | TSKS          | KPNA2           | DGCR6L        | TSACC    |
| CA2                | LAMA4           | SLFN5        | PMP22     | DLD                  | WIF1     | C10RF194          | LECT2        | TSNAX1P       | KRT23           | DHRS13        | TSLP     |
| CALB2              | LAMTOR3         | SLIRP        | POU2F3    | DLEU7                | WISP3    | C10RF94           | LLEP1        | TSPAN1        | LDHAL6B         | DHX15         | TTC25    |
| CASK               | LDHC            | SLITRK4      | PRF1      | DNAJB6               | XKR4     | C2ORF10           | LILRA5       | TSPAN16       | LDHC            | DKC1          | TUBB4B   |
| CAV2               | LECT2           | SMAD2        | PRMT2     | DNMT3A               | ZAK      | C2ORF141          | LINC00238    | TSSK2         | LIMS3-LOC440895 | DNMT1         | TXNDC9   |
| CBF6               | LEPREL1         | SMEK3P       | PRRG4     | EDARADD              | ZC3H13   | C2ORF173          | LINC00301    | TSSK3         | LINC00467       | DYNLRB2       | UQCRCFS1 |
| CBR3               | LHGR            | SMN1         | QDPR      | ELOVL4               | ZNF234   | C2ORF195          | LINC00467    | TSSK6         | LINC00479       | DYRK1A        | VAV2     |
| CBR4               | LIMD1-AS1       | SMPD1        | RAB5B     | EMD                  | ZNF302   | C2ORF85           | LINC00521    | TTBK2         | LINC01016       | EEF1A1        | VIMP     |
| CBWD2              | LIMS3-LOC440895 | SNCA         | RFTN1     | ERC1                 | ZNF408   | C22ORF23          | LINC00938    | TTC25         | LOC100134040    | EEF2          | WASF1    |
| CCCL2              | LINC00328       | SNHG1        | RPS6KA3   | FAM7                 | ZNF454   | C2ORF57           | LOC100132147 | TTC29         | LRAT            | EEFBAB5       | WEE1     |
| CCNG1              | LINC00643       | SNORD113-3   | RPS9      | FAM172A              | ZNF552   | C3ORF22           | LOC102725072 | TTL2          | LSM14B          | EHPBP1        | WHSC1L1  |
| CD14               | LINC00670       | SNORD113-4   | SELENOO   | FAM212A              | ZNF585   | C3ORF30           | LOC136242    | TTL3          | LYAR            | EI24          | WRN      |
| CD1E               | LIPH            | SNORD114-2   | SLC25A6   | FAM98B               | ZNF596   | C4ORF35           | LOC157740    | TULP2         | MAEL            | EID1          | ZCCHC10  |
| CD53               | LIP1T           | SNORD114-26  | SLCO2A1   | FBXL22               | ZNF596   | C5ORF60           | LOC440149    | TXNDC15       | MAGEB2          | EML4          | ZFAND5   |
| CDC37L1            | LITAF           | SNORD114-3   | SLF1      | FBXO38               | ZNF596   | C6ORF10           | LOC440896    | TXNDC2        | MAN1A1          | ENOPH1        | ZFP2     |
| CDKN3              | LOC100130428    | SNORD114-6   | SNX13     | FGF12                | ZNF596   | C6ORF106          | LOC645961    | UBAL2         | MAPK8           | EPB41L4A-AS1  | ZFP36    |
| CDR2               | LOC100131541    | SNORD13P2    | SOD2      | FKBP1                | ZNF596   | C6ORF204          | LOC727924    | UBAL4B        | MBTD1           | ITFDH         | ZFP91    |
| CD2S2              | LOC100131943    | SNORD55B     | SPARCL1   | FLRT1                | ZNF596   | C7ORF34           | LOC728450    | UBQLN3        | MRPL42          | EXOSC3        | ZNF1     |
| CELA2B             | LOC100132099    | SNORD58A     | SRPK3     | FOXJ1                | ZNF596   | C7ORF62           | LRR7C7A4     | UBQLNL        | MS4A5           | FAM162A       | ZMI2     |
| CENPC              | LOC100132686    | SNORD73A     | SSH2      | FRG1BP               | ZNF596   | C8ORF74           | LRKK1        | UNQ9391       | MS4A6E          | FAM175B       | ZPBP     |
| CENPI              | LOC100287869    | SNORD75      | SSH3      | FRG1JP               | ZNF596   | C9ORF131          | LY6G5B       | USP38         | MTRF1L          | FAM188A       | ZRAN2    |
| CEP76              | LOC283481       | SNORD78      | TERF1     | FSP2                 | ZNF596   | C9ORF173          | LYPLA1       | VCX2          | MYBL1           | FAM83F        | ZW10     |
| CFAP45             | LOC389834       | SNX2         | TGFB1     | FUS                  | ZNF596   | C9ORF9            | LYRM2        | VCX3A         | NKX3-1          | FKBP14        |          |
| CFH                | LOC63920        | SPACA9       | THPO      | GABRB1               | ZNF596   | CA2               | LYZL1        | VCX3B         | NUP62           | FLVCR2        |          |
| CFHR1              | LOC731157       | SPAG6        | TMOD2     | GABRB3               | ZNF596   | CABLES2           | LYZL2        | VRBP          | OIP5            | FN1           |          |
| CFHR3              | LR1F1           | SPARCL1      | TMPRSS2   | GDPD1                | ZNF596   | CABS1             | LYZL4        | VRK3          | OLAH            | FOPNL         |          |
| CFI                | LRRN3           | SPATA22      | TMPRSS4   | GJC2                 | ZNF596   | CABYR             | LYZL6        | VRNA1-1       | OTX1            | FTL           |          |
| CHST11             | LRR2TM3         | SPATA7       | TPO       | GJD2                 | ZNF596   | CAMKK2            | MAP1A        | VVA5B1        | PAAF1           | GAGE6         |          |
| CHST7              | LRWD1           | SPDYE1       | TRHDE     | GLIDR                | ZNF596   | CAPN11            | MARCH_11     | WBSR28        | PCSK4           | GBP5          |          |
| CILP               | LSM14B          | SPINK2       | TRIM2     | GLYATL1              | ZNF596   | CAPZ3             | MCL1P        | WDR38         | PCYT2           | GIMAP6        |          |
| CKS2               | LSM5            | SPTLC3       | UBE2QL1   | GNAO1                | ZNF596   | CATSPER1          | MC4R         | WDR39         | PDE1B           | GLIPR1L1      |          |
| CLEC2B             | LSP1            | SSMEM1       | USP38     | GPC2                 | ZNF596   | CATSPER4          | METRN        | WSCD1         | PDK1            | GMFB          |          |
| CLGN               | LTV1            | STAG1        | WRAP53    | GPD1                 | ZNF596   | CATSPERG          | MFSD6L       | YPCL1         | PIF4K2B         | GNF10         |          |
| CLMP               | LUM             | STEAP1B      | ZNF426    | GPM6B                | ZNF596   | CAV2              | MGAT4C       | ZBTB32        | PKP2            | GNPNAT1       |          |
| CLN5               | LYSMD3          | STRADB       | ZNF560    | GRK5                 | ZNF596   | CCDC114           | MGC13057     | ZC2HC1B       | PLAZR1          | GOLGA8N       |          |
| CMYA5              | MAD2L1          | STX10        | ZNF738    | GRM3                 | ZNF596   | CCDC110           | MMEL1        | ZDHHC19       | PLC21           | GPR137B       |          |
| CNOT7              | MAGEB16         | SYCP3        | ADCY1     | GY52                 | ZNF596   | CCDC116           | MORN3        | ZDHHC20       | PMS1            | GPR183        |          |
| CNTNAP2            | MAGEB2          | TAF1D        | ARHGEF7   | HAND1                | ZNF596   | CCDC126           | MRO          | ZFAND1        | POM121L9P       | GPRIN2        |          |
| COL12A1            | MAGEB6          | TAPT1-AS1    | ARGL1     | HBS1L                | ZNF596   | CCDC136           | MROH2B       | ZMAT3         | PPP13F3         | GTF2A1L       |          |
| COMM6              | MAGOHB          | TAS2R10      | C19ORF60  | HECW2                | ZNF596   | CCDC159           | MROH5        | ZMYND10       | PRSS50          | H2BFWT        |          |
| COPS2              | MALAT1          | TAS2R14      | C5        | HIF3A                | ZNF596   | CCDC185           | MROH7-TTC4   | ZNF110        | RAB39B          | HECA          |          |
| COX16              | MAMLT2          | TAS2R19      | C8ORF33   | HNRNPA0              | ZNF596   | CCDC54            | MS4A6E       | ZNF141        | RFPL3S          | HEXB          |          |
| CPM                | MAP1B           | TAS2R20      | CACNA2D3  | HNRNPR               | ZNF596   | CCDC7             | MTRN1A       | ZNF222        | RGS22           | HLA-DPA1      |          |
| CREB5              | MAPKAPK5-AS1    | TAS2R33      | CCDC138   | HNRNPJ               | ZNF596   | CCER1             | MTR          | ZNF474        | RIMBP3          | HRASLS        |          |
| CRHR1              | MARS            | TAS2R31      | CIDEA     | HS3ST3A1             | ZNF596   | CCIN              | MUC1         | ZNF560        | ROCK1           | HSD17B7       |          |
| CRISP2             | MCM4            | TAS2R45      | CISH      | HYMAI                | ZNF596   | CCT8L2            | MYL12B       | ZNF683        | SERPINA5        | HSPBAP1       |          |
| CRYAB              | MEF2C           | TAS2R50      | CLCN7     | IAPP                 | ZNF596   | CDK14A            | MYO22        | ZNF814        | SHK494          | HSPH1         |          |
| CRYGS              | MEGF8           | TBC1D3F      | CORO2B    | IBA57                | ZNF596   | CDK5R2            | NAT2         | ZNRF4         | SG3RF2          | ICAM1         |          |
| CRYZ               | METTL15         | TBX2         | CS        | IDNK                 | ZNF596   | CEL               | NCAN         | ZXDC          | SHPK            | IFI30         |          |
| CSRNP3             |                 |              |           |                      |          |                   |              |               |                 |               |          |



Supplementary Table S3. Differentially expressed genes of Post Meiotic Arrest, Meiotic Arrest, Pre Meiotic Arrest and Sertoli Cell Only Syndrome

| Post MA      | Up-Regulated Genes |          |           |             | Post MA   | Down-Regulated Genes |           |           |              |           |          |           |          |
|--------------|--------------------|----------|-----------|-------------|-----------|----------------------|-----------|-----------|--------------|-----------|----------|-----------|----------|
|              | MA                 | Pre MA   | SCOS      | SCOS        |           | MA                   | Pre MA    | SCOS      |              |           |          |           |          |
| AAMDC        | ACAT2              | STAG1    | ABCA9     | PSME1       | ABHD4     | PHKG1                | ABHD1     | ACSBG2    | ABHD1        | SMARCE1   | ABHD1    | PRM1      |          |
| ABCA10       | ACSS2              | STEAP1B  | ADAM28    | PTPRD       | ABRA      | phyhpb               | ACTG2     | ACTL7A    | ACE          | SMCP      | ACSBG2   | PRM2      |          |
| ABCA6        | ACSS3              | STRADB   | ADAMTS12  | PTPRE       | ACKR4     | PIK3C3               | ADAM29    | ACTRT2    | ACR          | SPACA3    | ACTL7A   | PRR30     |          |
| ABCA8        | AK3L1              | STX10    | ADAMTS5   | PTPRM       | ACOT2     | PIN4P1               | ADAM7     | ADAM29    | ACRBP        | SPACA4    | ACTL7B   | Prss21    |          |
| ABCA9        | ANAPFC10           | SYCP3    | AKT3      | RAB41       | ACSS1     | PLA2G4A              | AKAP1     | AKAP1     | ACRV1        | SPANXB1   | ADAD1    | PSMG1     |          |
| ACSM3        | ANP32A             | TAF1D    | AMFR      | RBMS3       | ADAMTS10  | PLA2G7               | ANKRD13B  | ANKRD13B  | ANKRD53      | SPATA16   | ADAM18   | PWP1      |          |
| ADAMTSS      | ANP32B             | TAS2R3   | AMTN      | RBMY2EP     | ADAMTS5   | PLCB4                | ANKRD53   | ANKRD53   | ARMC12       | SPATA9    | ADAM29   | RACGAP1   |          |
| ANKRD20A9P   | ANXA1              | TAS2R45  | ANAPCS    | RBP1        | ADCY1     | PLEK2                | ANO1      | ANO1      | ATP1A4       | SPATS1    | ADORA3   | RBM26-AS1 |          |
| ANTXR1       | ARHGAP12           | TAS2R50  | ANTXR2    | RECK        | AFG3L2    | PLP1                 | APBB3     | APBB3     | BANF2        | ADAM29    | ALDH1A2  | RFC3      |          |
| ATP5L2       | ARHGGEF6           | TEN2     | ANXA1     | RFPL4A      | AGER      | plma1                | ARMC12    | ARMC12    | BANF2        | ADAM29    | ALDH1A2  | RFC3      |          |
| C3orf35      | ASB13              | TET2     | AP1G1     | RG1         | AKT1      | PLXNA3               | ATP1A4    | ATP1A4    | BPIFA3       | ADAM3A    | ALS2CR11 | RG1       |          |
| C6orf203     | ATG2A              | TEX11    | APCDD1    | ROBO1       | ANGPTL1   | PLXNC1               | BATP1     | BATP1     | C10orf62     | ADAM5     | ANKRD13A | RIMBP3C   |          |
| C8orf49      | ATM                | TMEM106B | ARHGGEF6  | ROBO2       | ANKRD33B  | POLR2F               | ATP1A4    | ATP1A4    | C10orf82     | ADAMTS3   | ANKRD7   | RIMS1     |          |
| CAV2         | ATP1B3             | TMTC3    | ARMXC1    | RPA4        | ANXA1     | PP12719              | C16orf82  | C16orf82  | C17orf105    | ADRA1D    | TACR3    | ARP5      |          |
| CBWD2        | AZ12               | TMX1     | ARMXC3    | RPS27L      | AP1S2     | PP14571              | C19orf45  | C19orf45  | C17orf74     | AHCYL1    | TAF4     | ARMC12    | ROPN1B   |
| CLN5         | BCCIP              | TncRNA   | ASPHD2    | RPS4Y1      | APOBEC2   | PPF1BP2              | C10orf192 | C10orf192 | C19orf45     | AKAP4     | TEKT2    | ARMC4     | ROPN1L   |
| COMMD6       | BCORL1             | TOP2B    | AYTL1     | RPS6KA3     | APOL3     | PPP1R1A              | C20orf173 | C20orf173 | C10orf111    | ALOX15    | TEKT3    | ART3      | RSHL1    |
| COX16        | BET1               | TRAF3    | B2M       | RRS1        | ARHGFE6   | PRAGMIN              | C2orf57   | C2orf57   | C2orf57      | ANKRD5    | TES      | ASAP2     | RUBCNL   |
| CSRYG5       | C1D                | TRNT1    | BARHL1    | RTP4        | ATR8B4    | PRKACB               | C5orf60   | C5orf60   | C3orf30      | ANKRD55   | TEX38    | ASRGL1    | SAP30    |
| CSRNRP3      | C6orf166           | TUBB2A   | BCL6B     | SAMD9L      | ATR       | PRLR                 | C7orf34   | C7orf34   | C5orf60      | APOBEC4   | TFAP2A   | ASTN2-AS1 | SEC23B   |
| CTS          | C9orf78            | TUBB2B   | BHLHB2    | SAMHD1      | B2M       | PROK1                | C8orf74   | C8orf74   | C7orf34      | AQP5      | TMC5     | ATP1A3    | sec24a   |
| DKFZP779L18  | CASK               | UBLCP1   | BIVM      | SCRG1       | BRCC3     | PRPS2                | C9orf131  | C9orf131  | C8orf74      | BANF2     | TMC7     | ATP23     | SEPTIN10 |
| DNM3OS       | CAV2               | UIMC1    | BNIP3     | SDCBP       | BTN3A3    | PRR4                 | CABLES2   | CABLES2   | C9orf131     | BCAT1     | TMCO5A   | BAG6      | SEPTIN12 |
| DOCK10       | CBFB               | UTSP1    | C10orf116 | SERPINI1    | C10orf71  | PRRG4                | C10orf71  | C10orf71  | C9orf173     | BCL2L14   | TMEM144  | BAlAP2L1  | SESN3    |
| DPM1         | CBR4               | UTP11L   | C12orf29  | SHE         | C15orf52  | PTPN11               | C15orf52  | C15orf52  | CCIN         | BPIFA3    | TMEM189  | BANF2     | SLC26A8  |
| DRAM2        | CBWD2              | VAMP4    | C12orf41  | SIN3B       | c19orf60  | PSTN11               | c19orf60  | c19orf60  | CLPB         | BRIP1     | TMEM190  | BCL2L14   | SLC5A6   |
| ERAP2        | CCNG1              | VAMP7    | C1orf21   | SLC16A14    | C21orf62  | PWAR6                | CCDC114   | CCDC114   | CPA5         | C10orf62  | TMEM31   | BIRC5     | SLC6A16  |
| ESCO2        | CDC37L1            | VNN2     | C1orf57   | SLC25A4     | C5        | QDPR                 | CCDC116   | CCDC116   | CXCL16       | C13orf28  | TMPRSS6  | BOLL      | SMCP     |
| FAM103A1     | CDS2               | WDR75    | C6        | SLC37A3     | C7        | rab22a               | CCDC159   | CCDC159   | DNAH17       | C14orf129 | TNFAIP6  | BPIFA3    | SNHG11   |
| FLJ38894     | CENPC              | WNT11    | C6orf203  | SLC38A1     | CACNA1S   | RAB5B                | CCER1     | CCER1     | EIF4E        | C16orf78  | TNP1     | BRD7      | SOX30    |
| FLRT2        | CNOT7              | XIST     | C9orf170  | SLC8A3      | CALB2     | RARBES2              | CEP       | CEP       | FAM166A      | C17orf74  | TNP2     | BTG4      | SPACA4   |
| FRG1         | COP2               | ZEB2     | C9orf138  | SLCO4C1     | CALCLRL   | RRMS3                | CFAP74    | CFAP74    | FAM187B      | C10orf108 | TOX3     | C10orf62  | SPAG5    |
| FZD4         | COX16              | ZFAND1   | CAPN13    | SLFN5       | CAMK2N1   | RGS14                | CHD5      | CHD5      | FAM205A      | C10orf111 | TPPP2    | C10orf68  | SPAG6    |
| GLO1         | CPM                | ZNF141   | CASP4     | SMC5        | CAPN2     | RNF152               | CHRM4     | CHRM4     | FAM71A       | C10orf158 | TREML2   | c11orf70  | SPANXB1  |
| GPR21        | CRYAB              | ZNF189   | CAV2      | SNHG1       | CAPN5     | RNMT                 | CLPB      | CLPB      | FAM71B       | C10orf194 | TRPM5    | C12orf25  | SPATA3   |
| GPR52        | CTPS2              | ZNF22    | CBR3      | SNORD113-3  | cas9a     | ROBO2                | CNN1      | CNN1      | FAM71F1      | C10orf94  | TSACC    | C16orf71  | SPATA8   |
| GPR75        | CXYorf2            | ZNF260   | CCDC93    | SNORD113-4  | CCDC102A  | RP13-347D8.3         | CNTN2     | CNTN2     | FANCD2OS     | C10orf98  | TSKS     | C16orf78  | SPC25    |
| GSTA1        | DCUN1D5            | ZNF37A   | CCL2      | SNORD114-2  | CCDC138   | RPS9                 | COX6B2    | COX6B2    | JARID1A      | C20orf10  | TSPAN1   | C17orf105 | SPC53    |
| GSTA3        | DDF1               | ZNF430   | CD14      | SNORD114-26 | CCNG1     | RTN2                 | CPA5      | CPA5      | FER1L5       | C20orf141 | TSSK2    | C17orf39  | SPINK2   |
| GTFA2        | DDIAS              | ZNF486   | CDH19     | SNORD114-3  | CD14      | SAMD9                | CPNE2     | CPNE2     | FNDC8        | C20orf195 | TTBK2    | C17orf51  | SPRNT    |
| HFXA-AS1     | DICER1             | ZNF502   | CENP1     | SNORD114-6  | CD36      | SAMD9L               | CPTP      | CPTP      | FSCB         | C20orf85  | TUBA8    | C17orf74  | STAG3    |
| HMGCB1       | DLEU2              | ZNF503   | CFI       | SNORD56B    | CD48      | SAPS2                | CSNK1G2   | CSNK1G2   | FSCN3        | C22orf23  | TULP2    | C10orf105 | STK31    |
| HMGCR        | DMKN               | ZNF525   | CF2       | SNORD73A    | CD99      | SDS                  | DCST1     | DCST1     | FTMT         | C3orf22   | UBQLN3   | C10orf158 | SYCP1    |
| HMGCS1       | DNAJB11            | ZNF641   | CHI3L1    | SNORD78     | CDK5      | SEPP1                | DCST2     | DCST2     | GAPDHS       | C4orf35   | UNQ1A1   | C10rf194  | SYT6     |
| HNRNPU       | DNAJC12            | ZNF649   | CHRNA1    | SNX22       | CEBPA-AS1 | SFTPD                | DEFB126   | DEFB126   | GGN          | C5AR1     | UNQ9391  | C10QTNF3  | TARDBP   |
| HSD17B3      | DDP1               | ZNF682   | CHST11    | SPTLC3      | CFH       | SGCE                 | DNAH1     | DNAH1     | GGG1         | C5orf60   | UPK3A    | C1R       | TCAM1P   |
| HSD17B6      | DPPA3P2            | ZNF737   | CLCN5     | SS18L1      | CFI       | SH2B1                | DNAH17    | DNAH17    | GUCA1A       | C6orf10   | USF1     | C20orf85  | TC10L    |
| IGSF6        | EIF1AY             | ZNF770   | CLEC2B    | STMN2       | CFLAR     | SH3TC1               | DNAI2     | DNAI2     | KIF2B        | C6orf204  | USP2     | C22orf23  | TCP11    |
| IPO7         | ENTPD1             | ZNF845   | CMYA5     | TACSTD1     | CHL1      | SHD                  | DOC2A     | DOC2A     | KLHL10       | C7orf34   | WBSCR28  | C5orf60   | TCTE1    |
| KLHL9        | ENTY2              | ZNF845   | CNKSR3    | TBC1D13     | CIDEC     | SLC15A2              | DOT1L     | DOT1L     | LLELP1       | C7orf62   | ZC2HC1B  | C6orf10   | TDRG1    |
| KRT6A        | EPB41L4A           | ZNF845   | COL27A1   | TBC1D9      | CKMT2     | SLC25A14             | DPEP3     | DPEP3     | LINC00521    | C9orf131  | ZDHC19   | C7orf31   | TEKT3    |
| LAMA4        | ESCOC2             | ZNF845   | CPA3      | TBL1XR1     | CLEC10A   | SLC30A3              | DUS1L     | DUS1L     | LYZL6        | CA13      | CABS1    | C9orf72   | TEX30    |
| LHCGR        | ETFDH              | ZNF845   | CREB5     | TET2        | CLEC4M    | SLC38A1              | COBL1     | COBL1     | LYZL6        | CAMKK2    | DUSP1    | CALR3     | TEX38    |
| LIMD1-AS1    | EXOC6              | ZNF845   | CRYZ      | TEX11       | COL27A1   | SLC44A1              | DXO       | DXO       | MROH7-TTC4   | CAPN11    | CAPN11   | CAPN11    | TKFD1    |
| LINC00328    | FAM103A1           | ZNF845   | CSNK1E    | TLOC1       | CTHRC1    | TMEM158              | CPA3      | CPA3      | MSA46E       | CAPS      | CAPZA3   | CAPZA3    | TKTL2    |
| LINC00643    | FAM69A             | ZNF845   | CTHRC1    | TMEM43      | CTNNA3    | TMEM43               | CPED1     | CPED1     | NT5C1B       | CAPZA3    | CAPZB    | CASC5     | TKTL2    |
| LIP1         | FLJ38894           | ZNF845   | CTSA      | TncRNA      | CTSA      | TncRNA               | CRK       | CRK       | OAZ3         | CCDC126   | CCDC126  | CCDC136   | TMEM99   |
| LOC100130428 | FLJ44451           | ZNF845   | CTSG      | TRAF3       | CTSG      | TRAF3                | CRK       | CRK       | ODF1         | CCIN      | CCIN     | CCDC65    | TMUB2    |
| LOC100131541 | FNBP1              | ZNF845   | CTSK      | TRF3        | CTSK      | TRF3                 | CRYAB     | CRYAB     | ODF31        | CCR9      | CCT8L2   | CCIN      | TNFAIP6  |
| LOC100132099 | FPR1               | ZNF845   | CTSK      | TRF3        | CTSK      | TRF3                 | CRYZ      | CRYZ      | ODF31        | CCR9      | CCT8L2   | CCIN      | TNFAIP6  |
| LOC100287868 | FRG1               | ZNF845   | CUL5      | TSPO        | CTSD2     | SOX11                | CSDC2     | CSDC2     | ODF31        | CCR9      | CCT8L2   | CCIN      | TNFAIP6  |
| LOC731157    | FUSIP1             | ZNF845   | CXorf39   | UBE2A       | CTBS      | SP100                | CTSD2     | CTSD2     | PHOSPHO1     | CCR9      | CCT8L2   | CCIN      | TNFAIP6  |
| MALAT1       | FXC1               | ZNF845   | CXorf48   | USP31       | CTNB1     | SPARCL1              | CTNNB1    | CTNNB1    | PPP1R32      | CCR9      | CCT8L2   | CCIN      | TNFAIP6  |
| MAMML2       | GAK                | ZNF845   | CYP7B1    | USP9Y       | CTSC      | ST3GAL4              | CTSC      | CTSC      | PRM1         | CCR9      | CCT8L2   | CCIN      | TNFAIP6  |
| METTL15      | GAS5               | ZNF845   | DAZ1      | VCX         | CTSD      | STAG2                | CTSD      | CTSD      | PRM2         | CCR9      | CCT8L2   | CCIN      | TNFAIP6  |
| METTL21EP    | GDAP1              | ZNF845   | DKC       | VCY         | CTSK      | STEAP4               | CUX1      | CUX1      | PROCA1       | CCR9      | CCT8L2   | CCIN      | TNFAIP6  |
| MGARP        | GF11               | ZNF845   | DDX3Y     | VIPR1       | CUX1      | TAS2R14              | CYBB      | CYBB      | PRSS54       | CCR9      | CCT8L2   | CCIN      | TNFAIP6  |
| MGC24103     | GGA2               | ZNF845   | DDX58     | VTN         | CYBB      | TAS2R4               | CYBD      | CYBD      | RNF151       | CCR9      | CCT8L2   | CCIN      | TNFAIP6  |
| MIR107       | GNDPA2             | ZNF845   | DNAJB11   | WDR41       | CYLD      | TAX1BP3              | CYP8B1    | CYP8B1    | FOXM1        | CCR9      | CCT8L2   | CCIN      | TNFAIP6  |
| MIR128-1     | GPR21              | ZNF845   | DNASE1L3  | WNT8B       | CYP8B1    | TCF3                 | DSCR3     | DSCR3     | FSCB         | CCR9      | CCT8L2   | CCIN      | TNFAIP6  |
| MIR145       | GSTA1              | ZNF845   | DSCR3     | WTAP        | D4S234E   | TCL1A                | DAB2      | DAB2      | GAPDHS       | CCR9      | CCT8L2   | CCIN      | TNFAIP6  |
| MIR154       | GSTA3              | ZNF845   | DSEL      | ZEB2        | DAB2      | TERF1                | DAO       | DAO       | GEMIN4       | CCR9      | CCT8L2   | CCIN      | TNFAIP6  |
| MIR15A       | GTPBP10            | ZNF845   | DTNA      | ZNF226      | DAO       | TET2                 | EDN1      | EDN1      | SMCP         | CCR9      | CCT8L2   | CCIN      | TNFAIP6  |
| MIR18A       | HAT1               | ZNF845   | EDN1      | ZNF277      | EDN1      | ZNF277               | ELAVL3    | ELAVL3    | SPACA4       | CCR9      | CCT8L2   | CCIN      | TNFAIP6  |
| MIR197       | HERC4              | ZNF845   | ELAVL3    | ZNF641      | DDR2      | THOC2                | ENPP2     | ENPP2     | SPATA18      | CCR9      | CCT8L2   | CCIN      | TNFAIP6  |
| MIR199A2     | HIGD1A             | ZNF845   | ENPP2     | ZNF770      | DEF8      | THPO                 | HIGD1A    | HIGD1A    | SPATA20      | CCR9      | CCT8L2   | CCIN      | TNFAIP6  |
| MIR21        | HIST1H2AC          | ZNF845   | FAM114A1  | ZNF805      | DIFRAS3   | THY1                 | MIR21     | MIR21     | SPATA3       | CCR9      | CCT8L2   | CCIN      | TNFAIP6  |
| MIR214       | HIST1H2BH          | ZNF845   | FAM129A   | ZNF805      | DNAH1     | TM4SF18              | MIR214    | MIR214    | SPATA31A7    | CCR9      | CCT8L2   | CCIN      | TNFAIP6  |
| MIR218-1     | HIST2H2AB          | ZNF845   | FAM20C    | ZNF805      | DPT       | TMEM53               | MIR218-1  | MIR218-1  | SPATA31C1    | CCR9      | CCT8L2   | CCIN      | TNFAIP6  |
| MIR23B       | HLA-DPA1           | ZNF845   | FARP1     | ZNF805      | DTNA      | TMPRSS4              | MIR23B    | MIR23B    | SPERT        | CCR9      | CCT8L2   | CCIN      | TNFAIP6  |
| MIR27B       | HLA-DQA1           | ZNF845   | FAT1      | ZNF805      | DUSP26    | TNFSF10              | MIR27B    | MIR27B    | STGALNAC2    | CCR9      | CCT8L2   | CCIN      | TNFAIP6  |
| MIR29C       | HSD11B1            | ZNF845   | FEM1B     | ZNF805      | EDDM3A    | TPO                  | MIR29C    | MIR29C    | IL13         | CCR9      | CCT8L2   | CCIN      | TNFAIP6  |
| MIR30E       | HSD17B11           | ZNF845   | FHOD3     | ZNF805      | EDEM2     | TRBV19               | MIR30E    | MIR30E    | INPP1        | CCR9      | CCT8L2   | CCIN      | TNFAIP6  |
| MIR31        | HSPA8              | ZNF845   | FLJ38894  | ZNF805      | EIF2AK2   | TREM1                | MIR31     | MIR31     | KCTD19       | CCR9      | CCT8L2   | CCIN      | TNFAIP6  |
| MIR32        | HSPB3              | ZNF845   | EMCN      | ZNF805      | EMCN      | TRIM16               | MIR32     | MIR32     | KIAA1683     | CCR9      | CCT8L2   | CCIN      | TNFAIP6  |
| MIR503       | IER2               | ZNF845   | FLJ39632  | ZNF805      | ENDOU     | TRIM2                | MIR503    | MIR503    | KIF2B        | CCR9      | CCT8L2   | CCIN      | TNFAIP6  |
| MIR509       | IER3               | ZNF845   | FLRT2     | ZNF805      | EPX       | TRIM38               | MIR509    | MIR509    | KIR2DS2      | CCR9      | CCT8L2   | CCIN      | TNFAIP6  |
| MIR99A       | IFIT1              | ZNF845   | GABRG1    | ZNF805      | ERAP2     | TRIM63               | MIR99A    | MIR99A    | KLHL10       | CCR9      | CCT8L2   | CCIN      | TNFAIP6  |
| MIR99AHG     | IL16               | ZNF845   | GABRP     | ZNF805      | F2R       | TC37                 | MIR99AHG  | MIR99AHG  | KSR1         | CCR9      | CCT8L2   | CCIN      | TNFAIP6  |
| MIRLET7A2    | IL1A               | ZNF845   | GABK      | ZNF805      | FAM13A    | TUBA1C               | MIRLET7A2 | MIRLET7A2 | LOC102725072 | CCR9      | CCT8L2   | CCIN      | TNFAIP6  |
| MIRLET7C     | IL1RAP             | ZNF845   | GATA2     | ZNF805      | FAM167B   | UBE2D3               | MIRLET7C  | MIRLET7C  | LRC74A       | CCR9      | CCT8L2   | CCIN      | TNFAIP6  |
| MIRLET7F1    | JNG4               | ZNF845   | GBP1      | ZNF805      | FAM46A    | UGDH                 | MIRLET7F1 | MIRLET7F1 | LY6G5B       | CCR9      | CCT8L2   | CCIN      | TNFAIP6  |
| MIRLET7G     | IPO7               | ZNF845   | GCLC      | ZNF805      | FBLN5     | USP38                | MIRLET7G  | MIRLET7G  | LYZL1        | CCR9      | CCT8L2   | CCIN      | TNFAIP6  |
| MPLKIP       | JAM3               | ZNF845   | GLO1      | ZNF805      | fgl22     | VNN2                 | MPLKIP    | MPLKIP    | LYZL6        | CCR9      | CCT8L2   | CCIN      | TNFAIP6  |
| MSPMO1       | KCNK17             | ZNF845   | GPR128    | ZNF805      | FLG2      | WNSP2                | MSPMO1    | MSPMO1    | MME1         | CCR9      | CCT8L2   | CCIN      | TNFAIP6  |
| NKAPP1       | KCN3               | ZNF845   | GRIK2     | ZNF805      | FLJ36840  | ZEB2                 | NKAPP1    | NKAPP1    | MROH5        | CCR9      | CCT8L2   | CCIN      | TNFAIP6  |
| NRK          | KIAA0484           | ZNF845   | HERC4     | ZNF805      | FMO1      | ZEB1                 | NRK       | NRK       | MROH7-TTC4   | CCR9      | CCT8L2   | CCIN      | TNFAIP6  |
| OCLM         | KIAA1199           | ZNF845   | HIPK3     | ZNF805      | FRS1      | ZKSCAN1              | OCLM      | OCLM      | MUC1         | CCR9      | CCT8L2   | CCIN      | TNFAIP6  |
| OCML         | KIF1C              | ZNF845   | HIST1H4H  | ZNF805      | FXYD6     | ZNF189               | OCML      | OCML      | NEFM         |           |          |           |          |
